# Supplementary material for: Overcoming EMT-associated resistance to anti-cancer drugs via Src/FAK pathway inhibition
Source: PubMed Central journal article supplement (PMC4202126; doi:10.18632/oncotarget.2397), 2014-08-27
Supplement: oncotarget-05-7328-s001.pdf [file oncotarget-05-7328-s001.pdf]

## **Overcoming EMT-associated resistance to anti-cancer drugs via Src/FAK pathway inhibition**

### **Supplementary Material**

#### **Cell line authentication/quality control:**

##### **Short Tandem Repeat (STR) Profiling**

STR profiles were determined for each line using the Promega PowerPlex 16 System. This was performed once and compared to external STR profiles of cell lines (when available) to establish cell line ancestry. Loci analyzed: Detection of sixteen loci (fifteen STR loci and Amelogenin for gender identification), including D3S1358, TH01, D21S11, D18S51, Penta E, D5S818, D13S317, D7S820, D16S539, CSF1PO, Penta D, AMEL, vWA, D8S1179 and TPOX.

##### **SNP fingerprinting:**

SNP genotypes are performed each time new stocks are expanded for cryopreservation. Cell line identity is verified by high-throughput SNP genotyping using Fluidigm multiplexed assays. SNPs were selected based on minor allele frequency and presence on commercial genotyping platforms. SNP profiles are compared to SNP calls from available internal and external data (when available) to determine or confirm ancestry. In cases where data is unavailable or cell line ancestry is questionable, DNA or cell lines are re-purchased to perform profiling to confirm cell line ancestry. SNPs analyzed: rs11746396, rs16928965, rs2172614, rs10050093, rs10828176, rs16888998, rs16999576, rs1912640, rs2355988, rs3125842, rs10018359, rs10410468, rs10834627, rs11083145, rs11100847, rs11638893, rs12537, rs1956898, rs2069492, rs10740186, rs12486048, rs13032222, rs1635191, rs17174920, rs2590442, rs2714679, rs2928432, rs2999156, rs10461909, rs11180435, rs1784232, rs3783412, rs10885378, rs1726254, rs2391691,

rs3739422, rs10108245, rs1425916, rs1325922, rs1709795, rs1934395, rs2280916, rs2563263, rs10755578, rs1529192, rs2927899, rs2848745, rs10977980.

### **Mycoplasma Testing.**

All stocks were tested for mycoplasma prior to and after cells were cryopreserved. Two methods were used to avoid false positive/negative results: Lonza Mycoalert kit and Stratagene Mycosensor. Cell growth rates and morphology were also monitored for any batch-to-batch changes.

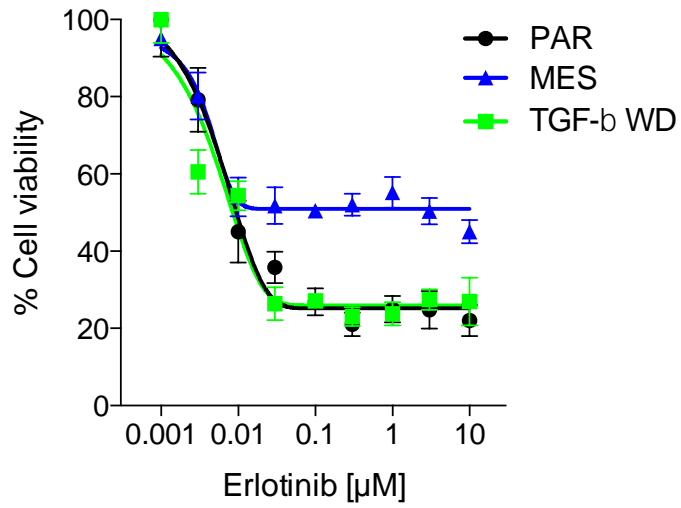

**Supplementary Figure 1: Prolonged TGF- $\beta$  withdrawal in mesenchymal cells are sensitive to erlotinib.** Cell viability assay demonstrating the effect of erlotinib on upon withdrawal of TGF- $\beta$  for 10 days (TGF- $\beta$  WD) in HCC827 mesenchymal cells. Error bars represent mean  $\pm$  SEM.

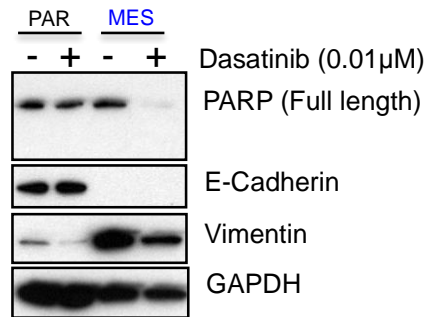

**Supplementary Figure 2: TGF- $\beta$ -induced EMT in A549 cells.** Immunoblot demonstrating the expression of E-Cadherin, Vimentin and PARP in parental (PAR) and mesenchymal (MES) A549 cells following exposure to dasatinib (0.01 $\mu$ M) for 72 hours.

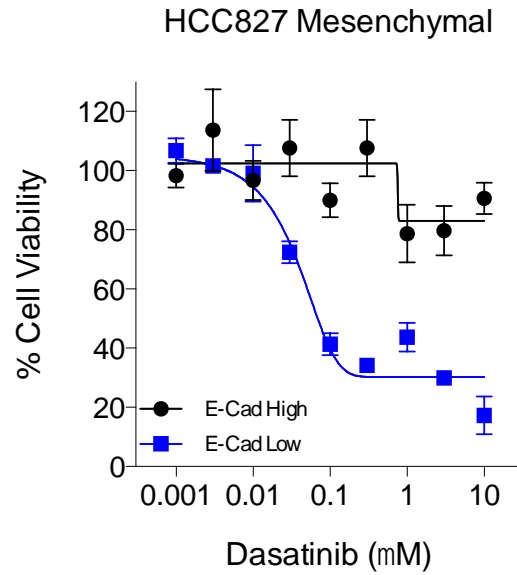

**Supplementary Figure 3: Mesenchymal cells exhibit increased sensitivity to Dasatinib.** Cell viability assay demonstrating the effect of dasatinib on E-Cadherin FACS-sorted high (E-Cad High) and low (E-Cad low) HCC827 mesenchymal cells. Error bars represent mean  $\pm$  SEM.

| <b>Protein</b> | <b>Parental</b> |                  |                  | <b>Mesenchymal</b> |                  |                  |
|----------------|-----------------|------------------|------------------|--------------------|------------------|------------------|
|                | <b>DMSO</b>     | <b>Dasatinib</b> | <b>Erlotinib</b> | <b>DMSO</b>        | <b>Dasatinib</b> | <b>Erlotinib</b> |
| <b>CDK1</b>    | 20 (3)          | 45 (4)           | 9 (3)            | 71 (4)             | 79 (5)           | 52 (4)           |
| <b>FAK1</b>    | 13 (7)          | 8 (4)            | 38 (17)          | 43 (22)            | 31 (15)          | 58 (27)          |
| <b>CASL</b>    | 0 (0)           | 0 (0)            | 3 (1)            | 22 (9)             | 42 (14)          | 83 (19)          |
| <b>AF1L2</b>   | 0 (0)           | 0 (0)            | 0 (0)            | 29 (11)            | 14 (9)           | 23 (13)          |
| <b>MAP1B</b>   | 0 (0)           | 0 (0)            | 0 (0)            | 24 (12)            | 24 (14)          | 9 (6)            |
| <b>FYN</b>     | 3 (2)           | 8 (4)            | 7 (4)            | 10 (6)             | 4 (3)            | 12 (7)           |
| <b>MYH9</b>    | 2 (1)           | 9 (4)            | 8 (5)            | 5 (4)              | 7 (6)            | 9 (4)            |
| <b>PTRF</b>    | 2 (1)           | 5 (3)            | 3 (2)            | 10 (4)             | 3 (2)            | 3 (2)            |
| <b>ACK1</b>    | 0 (0)           | 1 (1)            | 2 (1)            | 5 (3)              | 8 (4)            | 7 (3)            |
| <b>P85B</b>    | 0 (0)           | 0 (0)            | 2 (1)            | 5 (4)              | 6 (4)            | 6 (3)            |
| <b>DOCK1</b>   | 0 (0)           | 0 (0)            | 0 (0)            | 3 (1)              | 0 (0)            | 13 (2)           |
| <b>PTPRE</b>   | 0 (0)           | 0 (0)            | 0 (0)            | 4 (1)              | 0 (0)            | 5 (1)            |
| <b>ABL1</b>    | 0 (0)           | 6 (2)            | 0 (0)            | 2 (2)              | 0 (0)            | 0 (0)            |
| <b>CNN3</b>    | 0 (0)           | 0 (0)            | 0 (0)            | 3 (1)              | 0 (0)            | 0 (0)            |
| <b>BCAR3</b>   | 0 (0)           | 0 (0)            | 0 (0)            | 0 (0)              | 0 (0)            | 2 (2)            |
| <b>ACTN1</b>   | 0 (0)           | 0 (0)            | 0 (0)            | 0 (0)              | 0 (0)            | 1 (1)            |

**Supplementary Figure 4: Dasatinib suppresses Src/FAK signaling and associated protein phosphorylation in the mesenchymal cells.** Table of peptide spectral matches for phosphotyrosine peptides following erlotinib (50nM) or dasatinib (30nM) treatment for 24h, demonstrating changes in phosphorylation in the HCC827 mesenchymal cells. Highlighted in red are those kinases associated with Src/FAK signaling.

| Gene Name | Total (unique) peptides |
|-----------|-------------------------|
| FAK1      | 241 (47)                |
| CASL      | 149 (28)                |
| PEAK1     | 80 (15)                 |
| CDK1      | 68 (4)                  |
| AF1L2     | 60 (19)                 |
| MAP1B     | 57 (23)                 |
| P85B      | 49 (12)                 |
| PTRF      | 41 (7)                  |
| DOCK1     | 7 (1)                   |
| FYN       | 34 (8)                  |
| GIT2      | 32 (9)                  |
| MYH9      | 32 (6)                  |
| VCL       | 28 (4)                  |
| EPHB1     | 23 (5)                  |
| ACK1      | 31 (6)                  |
| IL31R     | 16 (4)                  |
| ACTN1     | 15 (5)                  |
| BCAR3     | 15 (6)                  |
| PTPRE     | 12 (1)                  |
| CNN3      | 9 (3)                   |
| ABL1      | 8 (4)                   |

**Supplementary Figure 5: Summary of tyrosine phosphorylated peptides identified in the HCC827 mesenchymal cells.** Table summarizing peptide spectral matches (total and unique) observed following phosphotyrosine enrichment from HCC827 mesenchymal cells. Highlighted in red are those kinases associated with Src/FAK signaling.

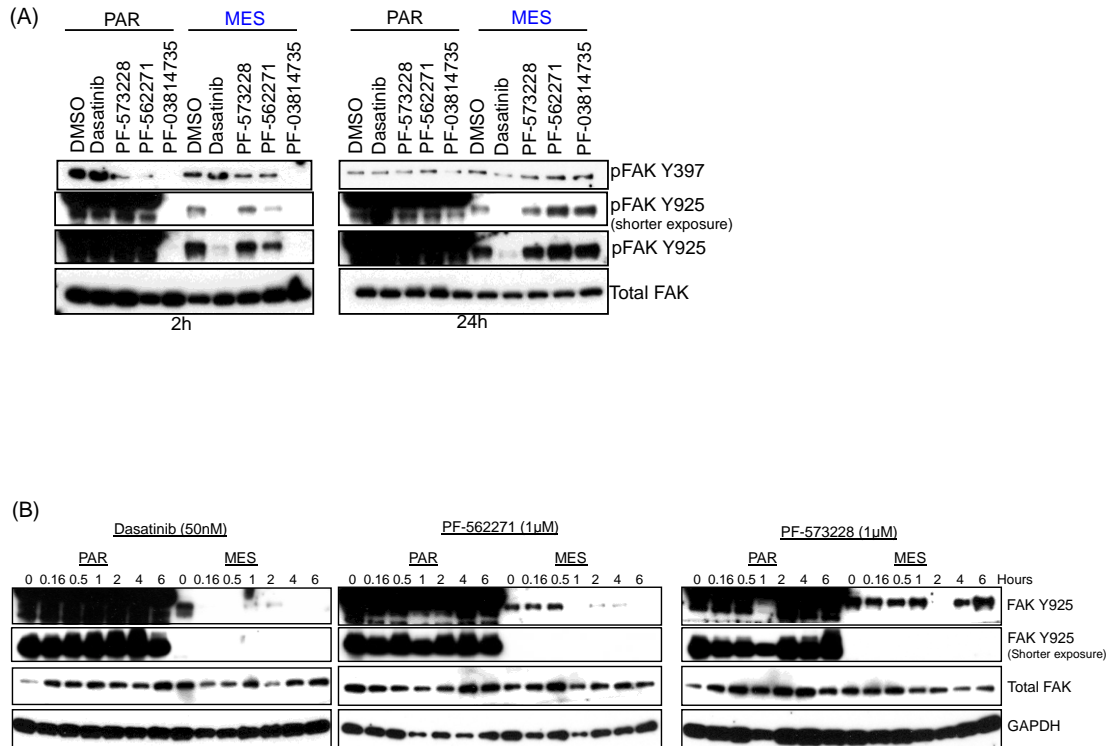

**Supplementary Figure 6: Dasatinib suppresses pFAK more potently than reported FAK inhibitors.** (A) Immunoblot demonstrating the expression of phospho-FAK in parental (PAR) and mesenchymal (MES) HCC827 cells following exposure to dasatinib (50nM), PF-562271 (1µM), PF-562271 (1µM) and PF-0381473 for 2 and 24 hours. (B) Immunoblot demonstrating the expression of phospho-FAK in parental (PAR) and mesenchymal (MES) HCC827 cells following exposure to dasatinib (50nM), PF-562271 (1µM), and PF-562271 (1µM) during a 6 hour time course.



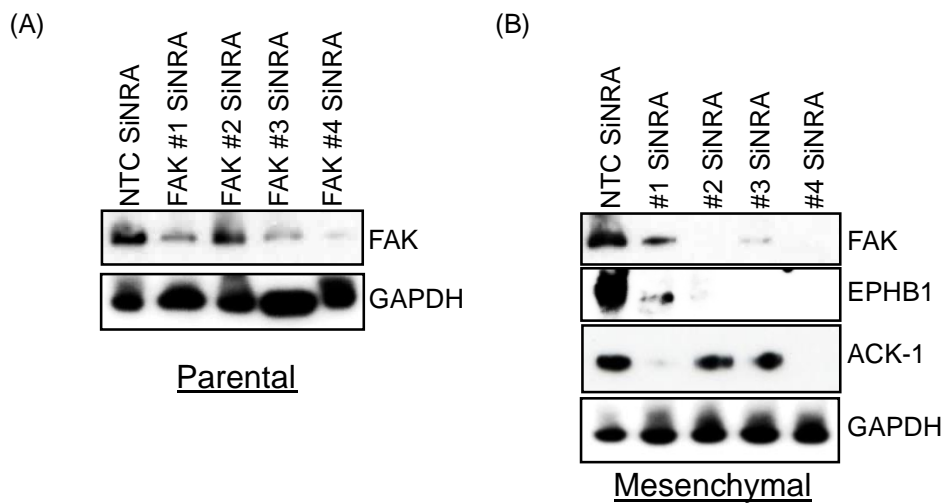

**Supplementary Figure 7: SiRNA knockdown validation.** (A) Immunoblot demonstrating FAK expression following siRNA for 72 hours in parental HCC827 cell line. (B) Immunoblot demonstrating FAK, EPHB1 and ACK-1 expression following siRNA for 72 hours in mesenchymal HCC827 cells.

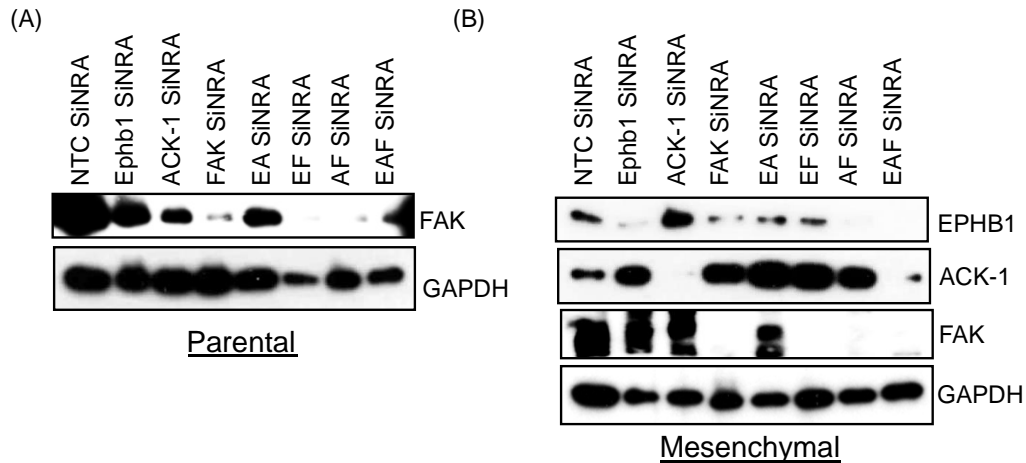

**Supplementary Figure 8: SiRNA combination knockdown.** SiRNA single or combined (EA; Ephb1&ACK-1, EF; Ephb1&FAK, AF; ACK-1&FAK, EAF; Ephb1,ACK-1& FAK) knockdown. SiRNA oligo#4 was used in all cases. (A) Immunoblot demonstrating FAK expression following siRNA for 72 hours in parental HCC827 cells. (B) Immunoblot demonstrating FAK, EPHB1 and ACK-1 expression following siRNA for 72 hours in mesenchymal HCC827 cells.

**Table S1:** Cell viability of HCC827 parental and mesenchymal cell lines showing IC<sub>50</sub> values following 72h exposure to drug. Ratio reflects the IC<sub>50</sub> of mesenchymal/parental cells.

| Cell line: HCC827 |                                |                           |                           |          |
|-------------------|--------------------------------|---------------------------|---------------------------|----------|
| Drug              | Target                         | PAR IC <sub>50</sub> (μM) | MES IC <sub>50</sub> (μM) | Ratio    |
| Erlotinib         | EGFR inhibitor                 | 0.006                     | >10                       | 1666.667 |
| Gefitinib         | EGFR inhibitor                 | 0.003                     | >2                        | 666.667  |
| Docetaxel         | Chemotherapeutic agent         | 0.032                     | >10                       | 312.500  |
| SB202190          | p38 MAPK inhibitor             | 0.107                     | >20                       | 186.916  |
| Pictilisib        | PI3K inhibitor                 | 0.084                     | >10                       | 118.747  |
| DL11f             | EGFR/HER3 inhibitor            | 0.132                     | >10                       | 75.593   |
| Trichostatin A    | HDAC inhibitor                 | 0.013                     | 0.041                     | 51.471   |
| 5-FU              | Anti-metabolite                | 3.908                     | >200                      | 51.177   |
| PPP               | IGF1R inhibitor                | 0.309                     | >10                       | 32.362   |
| MS-275            | HDAC inhibitor                 | 0.031                     | >1                        | 32.258   |
| GW 843682X        | PLK inhibitor                  | 0.795                     | >20                       | 25.157   |
| PD325901          | MEK inhibitor                  | 0.452                     | >10                       | 22.124   |
| BEZ235            | PI3K inhibitor                 | 0.560                     | >10                       | 17.857   |
| Salinomycin       | Potassium ionophore            | 0.193                     | 1.615                     | 8.368    |
| Mocetinostat      | HDAC inhibitor                 | 0.530                     | 3.152                     | 5.947    |
| Doxorubicin       | Chemotherapeutic agent         | 0.009                     | 0.039                     | 4.427    |
| Lestaurtinib      | JAK2 inhibitor                 | 0.101                     | 0.383                     | 3.792    |
| Cisplatin         | Chemotherapeutic agent         | 3.382                     | >10                       | 2.957    |
| GF109203X         | PKC inhibitor                  | 3.394                     | >10                       | 2.946    |
| PF-562271         | FAK/PYK2 inhibitor             | 3.455                     | >10                       | 2.894    |
| CGK733            | ATM/ATR inhibitor              | 3.537                     | >10                       | 2.827    |
| Romidepsin        | HDAC inhibitor                 | 0.001                     | 0.002                     | 2.306    |
| Sorafenib         | VEGFR, PDGFR inhibitor         | 4.639                     | >10                       | 2.156    |
| SB220025          | p38 MAPK inhibitor             | 2.743                     | 5.673                     | 2.068    |
| Paclitaxel        | Chemotherapeutic agent         | 0.015                     | 0.031                     | 2.067    |
| Valproic acid     | HDAC inhibitor                 | 4.900                     | >10                       | 2.041    |
| PP2               | SFK inhibitor                  | 0.151                     | 0.295                     | 1.954    |
| Flavopiridol      | CDK2, CDK9 inhibitor           | 0.035                     | 0.065                     | 1.857    |
| GW8510            | CDK2 inhibitor                 | 9.099                     | 15.252                    | 1.676    |
| Crizotinib        | MET/ALK inhibitor              | 3.810                     | 5.198                     | 1.364    |
| PD173074          | FGFR1/3 inhibitor              | 3.391                     | 4.457                     | 1.315    |
| 5-azacytidine     | DNA Demethylase                | 6.437                     | 7.463                     | 1.159    |
| PKC412            | EGFR T790M inhibitor           | 0.128                     | 0.146                     | 1.137    |
| Imatinib          | ABL1 inhibitor                 | 17.603                    | >20                       | 1.136    |
| BV6               | Dimer IAP antagonist           | 16.324                    | 18.222                    | 1.116    |
| Vismodegib        | Shh inhibitor                  | >10                       | >10                       | 1.000    |
| PF 573228         | FAK inhibitor                  | >20                       | >20                       | 1.000    |
| Saracatinib       | Abl/Src inhibitor              | 0.066                     | 0.064                     | 0.970    |
| AEW541            | IGF1R inhibitor                | 5.553                     | 5.123                     | 0.923    |
| NSC625987         | CDK4 inhibitor                 | 22.840                    | >20                       | 0.876    |
| CPT-11/Irinotecan | Type 1 topoisomerase inhibitor | 0.666                     | 0.579                     | 0.870    |
| JQ1               | Brd4 inhibitor                 | 1.118                     | 0.951                     | 0.851    |
| Lovastatin        | inhibits HMG-CoA reductase     | 15.726                    | 13.284                    | 0.845    |
| SAHA              | HDAC inhibitor                 | 1.300                     | 1.000                     | 0.769    |
| 5Z-7-Oxozeaenol   | TAK1 inhibitor                 | 3.391                     | 2.543                     | 0.750    |
| H89               | cAMP inhibitor                 | 17.200                    | 12.750                    | 0.741    |
| Vargatef          | VEGF inhibitor                 | 3.245                     | 2.403                     | 0.741    |
| Phenformin        | AMPK activator                 | 0.265                     | 0.185                     | 0.698    |
| Sunitinib         | VEGF inhibitor                 | >10                       | 5.650                     | 0.565    |
| BX912             | PDK1 inhibitor                 | 2.160                     | 0.966                     | 0.447    |
| PF-03814735       | Aurora kinase inhibitor        | 3.569                     | 1.235                     | 0.346    |
| BAY 11-7821       | NF-κB inhibitor                | 5.201                     | 1.516                     | 0.291    |
| PHA-739358        | Aurora kinase inhibitor        | 3.382                     | 0.759                     | 0.224    |
| Dasatinib         | Abl/Src inhibitor              | 0.062                     | 0.009                     | 0.145    |

**Table S2:** Cell viability of A549 parental and mesenchymal cell lines showing IC<sub>50</sub> values of following 72h exposure to drug. Ratio reflects the IC<sub>50</sub> of mesenchymal/parental cells.

| Cell line: A549 |                                         |               |               |        |
|-----------------|-----------------------------------------|---------------|---------------|--------|
| Drug            | Target                                  | PAR IC50 (μM) | MES IC50 (μM) | Ratio  |
| GDC-0941        | PI3K inhibitor                          | 0.528         | >20           | 37.864 |
| Phenformin      | AMPK activator                          | 2.739         | 64.525        | 23.555 |
| PD0325901       | MEK inhibitor                           | 0.013         | 0.105         | 8.211  |
| Salinomycin     | Potassium ionophore                     | 0.087         | 0.478         | 5.494  |
| 5Z-7-Oxozeaenol | MEK inhibitor                           | 0.642         | 3.371         | 5.255  |
| 5-FU            | Chemotherapeutic agent                  | 1.267         | 6.645         | 5.246  |
| Carboplatin     | Chemotherapeutic agent                  | 26.674        | >100          | 3.749  |
| PD325901        | MEK inhibitor                           | 0.042         | 0.145         | 3.452  |
| Pemetrexed      | Chemotherapeutic agent                  | 0.654         | 1.830         | 2.797  |
| JQ1             | Brd4 inhibitor                          | 0.415         | 0.980         | 2.359  |
| Gemcitabine     | Chemotherapeutic agent                  | 0.005         | 0.008         | 1.630  |
| Erlotinib       | EGFR inhibitor                          | 0.820         | 1.252         | 1.527  |
| Tunicamycin     | Inhibits GPT                            | 0.548         | 0.826         | 1.506  |
| Gemcitabine     | Chemotherapeutic agent                  | 0.004         | 0.006         | 1.500  |
| Flavopiridol    | CDK2, CDK9 inhibitor                    | 0.055         | 0.071         | 1.298  |
| PKC412          | EGFR T790M inhibitor                    | 0.807         | 1.026         | 1.271  |
| Sorefinib       | VEGFR, PDGFR inhibitor                  | 2.496         | 3.124         | 1.252  |
| Imatinib        | ABL1 inhibitor                          | 5.793         | 7.082         | 1.223  |
| Thapsigargin    | Inhibitor of ER Ca <sup>++</sup> ATPase | 0.130         | 0.158         | 1.213  |
| BEZ235          | PI3K inhibitor                          | 0.190         | 0.230         | 1.211  |
| GW 843682X      | PLK inhibitor                           | 8.887         | 9.947         | 1.119  |
| 5-azacytidine   | DNA Demethylase                         | 1.053         | 1.162         | 1.104  |
| Nutlin-3a       | p53/MDM2 inhibitor                      | 3.364         | 3.652         | 1.086  |
| Cytochalasin D  | Chemotherapeutic agent                  | 0.046         | 0.050         | 1.074  |
| SAHA            | HDAC inhibitor                          | 1.634         | 1.747         | 1.069  |
| PPP             | IGF1R Inhibitor                         | 0.244         | 0.250         | 1.025  |
| PF-573228       | FAK inhibitor                           | >20           | 19.720        | 0.986  |
| PD173074        | FGFR1/3 inhibitor                       | 11.435        | 11.239        | 0.983  |
| Bortezomib      | Proteasome inhibitor                    | 0.517         | 0.505         | 0.977  |
| TAE684          | ALK inhibitor                           | 1.000         | 0.951         | 0.951  |
| Doxorubicin     | Chemotherapeutic agent                  | 0.282         | 0.240         | 0.849  |
| GW8510          | CDK2 inhibitor                          | >20           | 15.704        | 0.785  |
| PF-562271       | FAK/PYK2 inhibitor                      | 1.291         | 0.999         | 0.774  |
| Lovastatin      | inhibits HMG-CoA reductase              | >20           | 14.604        | 0.730  |
| Sunitinib       | VEGF inhibitor                          | 1.698         | 1.155         | 0.680  |
| Mevastatin      | inhibits HMG-CoA reductase              | >20           | 13.431        | 0.672  |
| SB431542        | TGF-B inhibitor                         | 3.187         | 2.095         | 0.657  |
| Oligomycin      | Inhibitor of OxPhos                     | 0.105         | 0.062         | 0.585  |
| Taxol           | Chemotherapeutic agent                  | 0.016         | 0.009         | 0.558  |
| PF-03814735     | Aurora kinase inhibitor                 | 0.175         | 0.095         | 0.543  |
| PF 573228       | FAK inhibitor                           | 4.525         | 2.422         | 0.535  |
| Tivantinib      | c-MET inhibitor                         | 0.456         | 0.232         | 0.509  |
| Crizotinib      | c-MET/ALK inhibitor                     | 0.856         | 0.315         | 0.368  |
| PHA-739358      | Aurora kinase inhibitor                 | 0.703         | 0.257         | 0.366  |
| AEW541          | IGF1R Inhibitor                         | 0.703         | 0.203         | 0.289  |
| PP2             | SFK inhibitor                           | 4.354         | 0.890         | 0.204  |
| BX912           | PDK1 inhibitor                          | 6.715         | 1.258         | 0.187  |
| Dasatinib       | Abl/Src inhibitor                       | 0.614         | 0.022         | 0.036  |

**Table S3: Listing of drugs used and their source.**

| Drug              | Source                     |
|-------------------|----------------------------|
| 5-azacytidine     | Sigma                      |
| 5-FU              | Sigma                      |
| 5Z-7-Oxozeaenol   | Tocris                     |
| AEW541            | Selleck                    |
| BAY 11-7082       | Selleck                    |
| BAY 11-7821       | Tocris                     |
| BEZ235            | SelleckBio                 |
| bortezomib        | SelleckBio                 |
| BV6               | GNE                        |
| BX912             | Axon Medchem               |
| Carboplatin       | Sigma                      |
| CGK733            | Tocris                     |
| Cisplatin         | LC Laboratories            |
| CPT-11/Irinotecan | LKT Laboratories           |
| Crizotinib        | LC Laboratories            |
| Cytochalasin D    | Tocris                     |
| Dasatinib         | LC Laboratories            |
| DL11f             | GNE                        |
| Docetaxel         | LC Laboratories            |
| Doxorubicin       | Sigma                      |
| Erlotinib         | LC Laboratories            |
| Flavopiridol      | Sigma                      |
| GDC-0941          | GNE                        |
| Gefitinib         | SelleckBio                 |
| Gemcitabine       | Toronto Research Chemicals |
| GF109203X         | Tocris                     |
| GW 843682X        | Axon Medchem               |
| GW8510            | Sigma                      |
| H89               | Tocris                     |
| Imatinib          | SelleckBio                 |
| JQ1               | Selleck                    |
| Lestaurtinib      | LC Laboratories            |
| Lovastatin        | Tocris                     |
| Mevastatin        | Tocris                     |
| Mocetinostat      | LC Laboratories            |
| MS-275            | Sigma                      |
| NSC625987         | EMD                        |
| Nutlin-3a         | Tocris                     |
| Oligomycin        | Sigma                      |
| Paclitaxel        | LC Laboratories            |
| PD173074          | Tocris                     |
| PD325901          | Selleck                    |
| Pemetrexed        | LC Laboratories            |
| PF-03814735       | Selleck                    |
| PF-562271         | Selleck                    |
| PF573228          | Tocris                     |
| PHA-739358        | Selleck                    |
| Phenformin        | Sigma                      |
| Pictilisib        | LC Laboratories            |
| PKC412            | LC Laboratories            |
| PP2               | Tocris                     |
| PPP               | Calbiochem                 |
| Romidepsin        | Tocris                     |
| SAHA              | Tocris                     |
| Salinomycin       | Selleck                    |
| Saracatinib       | LC Laboratories            |
| SB202190          | Calbiochem                 |
| SB220025          | Calbiochem                 |
| SB431542          | Selleck                    |
| Sorafenib         | LC Laboratories            |
| Sunitinib         | Tocris                     |
| TAE684            | Selleck                    |
| Taxol             | Tocris                     |
| Thapsigargin      | Tocris                     |
| Tivatnib          | Selleck                    |
| Trichostatin A    | Selleck                    |
| Tunicamycin       | Tocris                     |
| Valproic acid     | Calbiochem                 |
| Vargatef          | LC Laboratories            |
| Vismodegib        | LC Laboratories            |
